# Supplementary material
Source: Royal Society of Chemistry journal article supplement (doi:10.1039/d6lp00059b)
Supplement: d6lp00059b1.pdf [file d6lp00059b1.pdf]

## Supplementary Information

# Sustainable Barrier Coatings for Food Packaging with a Built-in, Redox-activated Trigger for Surface Hydrophilization

*Xiong Xiong,<sup>a</sup> Sulari Anthony,<sup>b</sup> Juliane Eberhardt,<sup>c</sup> Sabine Rosenfeldt,<sup>d</sup> Daniel Friedrich,<sup>a</sup> Stefan Peiffer,<sup>e</sup> Johannes C. Brendel,<sup>\*c</sup> Tillmann Lueders,<sup>\*b</sup> Josef Breu<sup>\*a</sup>*

- a. University of Bayreuth, Bavarian Polymer Institute and Department of Chemistry, Universitätsstr. 30, 95440 Bayreuth, Germany. E-mail: [Josef.breu@uni-bayreuth.de](mailto:Josef.breu@uni-bayreuth.de)
- b. University of Bayreuth, Ecological Microbiology, Bayreuth Center of Ecology and Environmental Research (BayCEER), 95440 Bayreuth, Germany. E-mail: [tillmann.lueders@uni-bayreuth.de](mailto:tillmann.lueders@uni-bayreuth.de)
- c. University of Bayreuth, Macromolecular Chemistry I, 95440 Bayreuth, Germany. E-mail: [johannes.brendel@uni-bayreuth.de](mailto:johannes.brendel@uni-bayreuth.de)
- d. University of Bayreuth, Physical Chemistry I, Universitätsstr. 30, 95440 Bayreuth, Germany
- e. University of Bayreuth, Bayreuth Center of Ecology and Environmental Research (BayCEER), Department of Hydrology, Bayreuth 95440, Germany

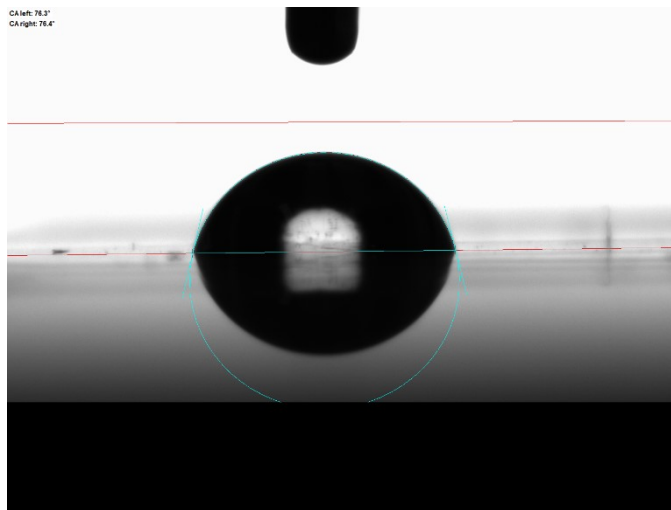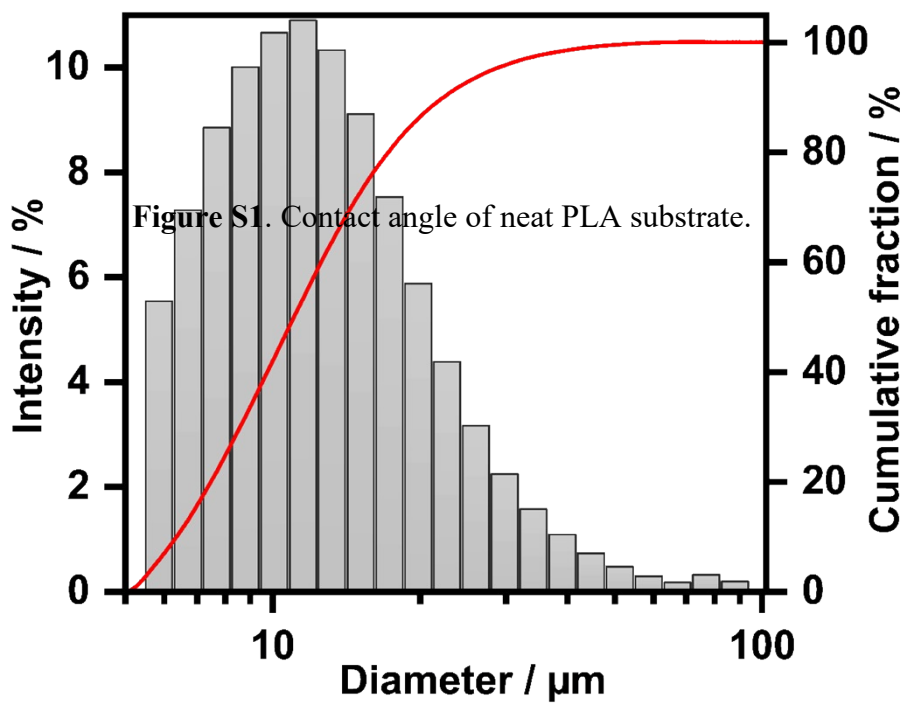

**Figure S2.** Number weighted size distribution indicating a mean size of 9  $\mu\text{m}$  as determined C4VMT nanosheets by SLS.

| Component         | CS (mm/s)     | QS (mm/s)     | Area (%)     |
|-------------------|---------------|---------------|--------------|
| Fe <sup>III</sup> | 0.390 ± 0.004 | 1.550 ± 0.007 | 78.12 ± 1.14 |
| Fe <sup>II</sup>  | 1.330 ± 0.005 | 2.860 ± 0.009 | 21.88 ± 1.14 |

**Table S1.** Mößbauer hyperfine parameters of spectra of the C4VMT nanosheets after being suspended in the culture medium (corresponding to Figure 3b) with *Geobacter metallireducens*, showing the partial reduction of structural Fe(III) to Fe(II).

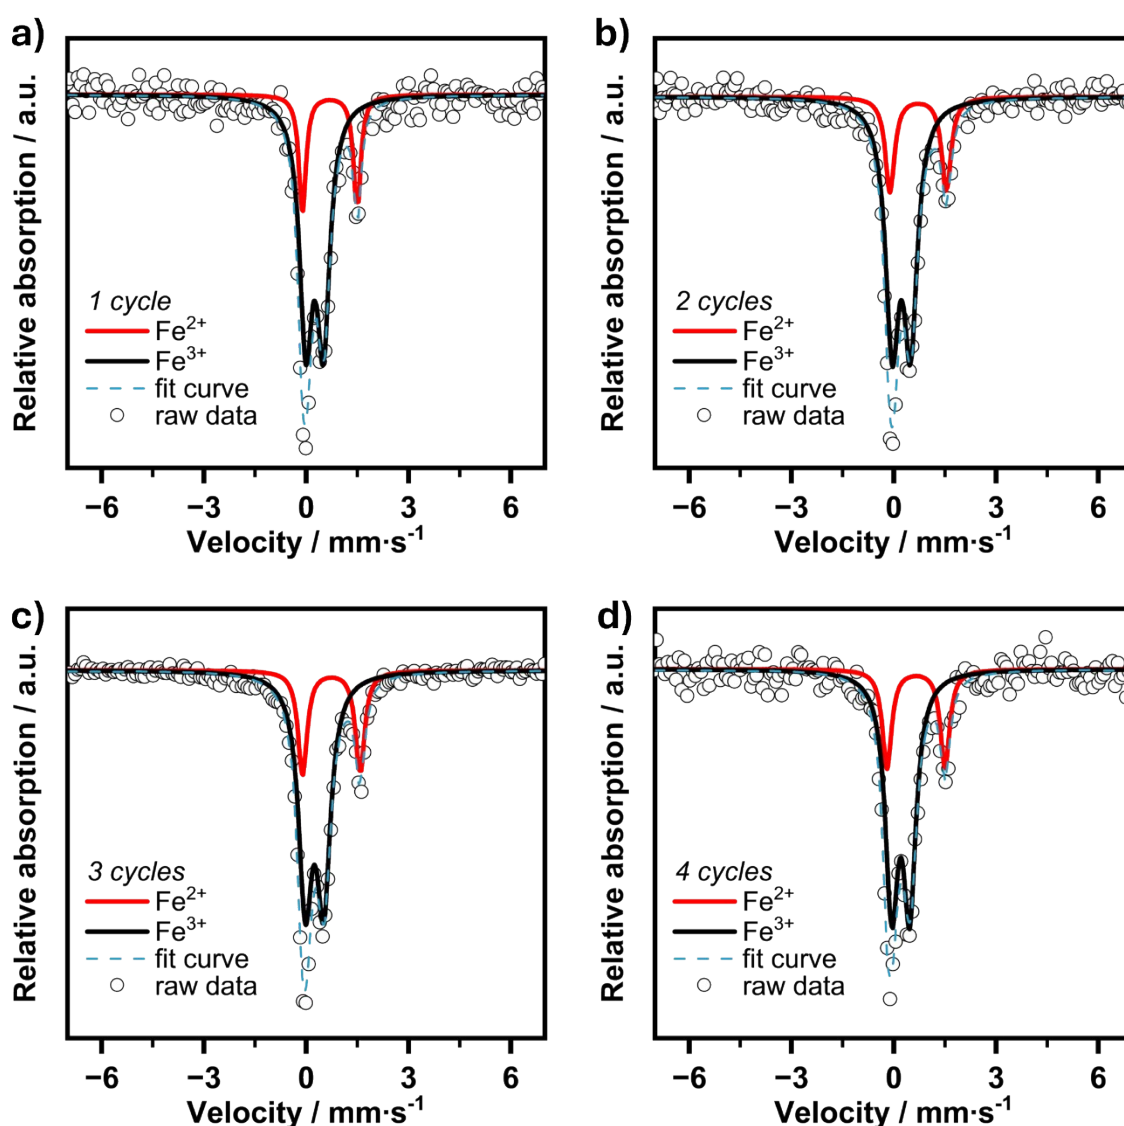

**Figure S3.** Mößbauer spectra of the C4VMT/PNAT<sub>30</sub> coatings after being suspended in the culture medium with *Geobacter metallireducens* (corresponding to Figure 3c), showing the partial reduction of structural Fe(III) to Fe(II).

| Component                  | CS (mm/s)     | QS (mm/s)     | Area (%)     |
|----------------------------|---------------|---------------|--------------|
| Fe <sup>III</sup> 0 cycle  | 0.380 ± 0.003 | 1.440 ± 0.006 | 100          |
| Fe <sup>III</sup> 1 cycle  | 0.364 ± 0.003 | 1.501 ± 0.003 | 78.71 ± 3.48 |
| Fe <sup>II</sup> 1 cycles  | 1.512 ± 0.004 | 2.881 ± 0.008 | 21.29 ± 3.48 |
| Fe <sup>III</sup> 2 cycles | 0.342 ± 0.006 | 1.482 ± 0.002 | 77.96 ± 3.08 |
| Fe <sup>II</sup> 2 cycles  | 1.448 ± 0.004 | 2.754 ± 0.008 | 22.04 ± 3.08 |
| Fe <sup>III</sup> 3 cycles | 0.358 ± 0.005 | 1.491 ± 0.004 | 75.65 ± 1.37 |
| Fe <sup>II</sup> 3 cycles  | 1.428 ± 0.002 | 2.846 ± 0.003 | 24.05 ± 1.37 |
| Fe <sup>III</sup> 4 cycles | 0.402 ± 0.003 | 1.511 ± 0.011 | 75.82 ± 3.29 |
| Fe <sup>II</sup> 4 cycles  | 1.508 ± 0.002 | 2.796 ± 0.011 | 24.18 ± 3.29 |

**Table S2.** Mößbauer hyperfine parameters of the C4VMT/PNAT<sub>30</sub> coatings after being suspended in the culture medium with *Geobacter metallireducens* with time differences.

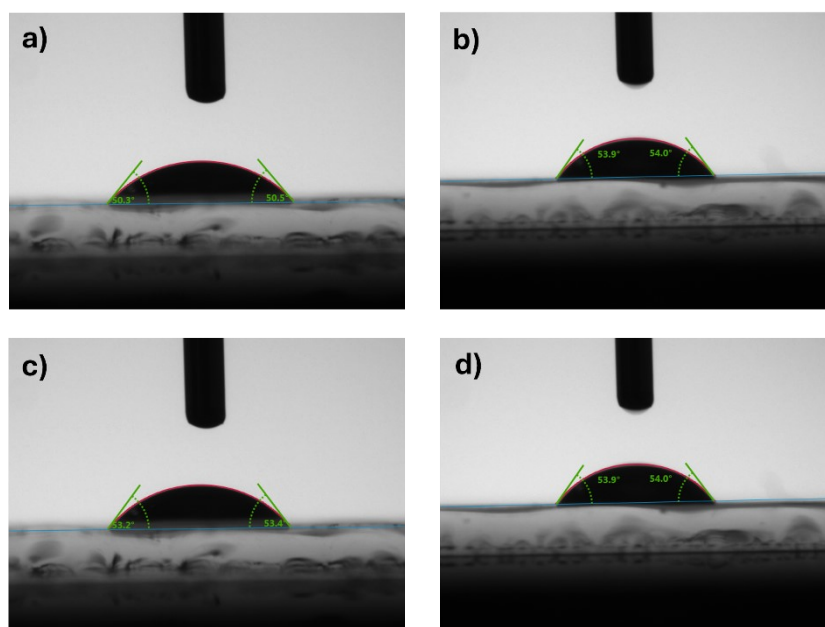

**Figure S4.** Contact angle of the pristine C4VMT/PNAT<sub>30</sub> coatings.

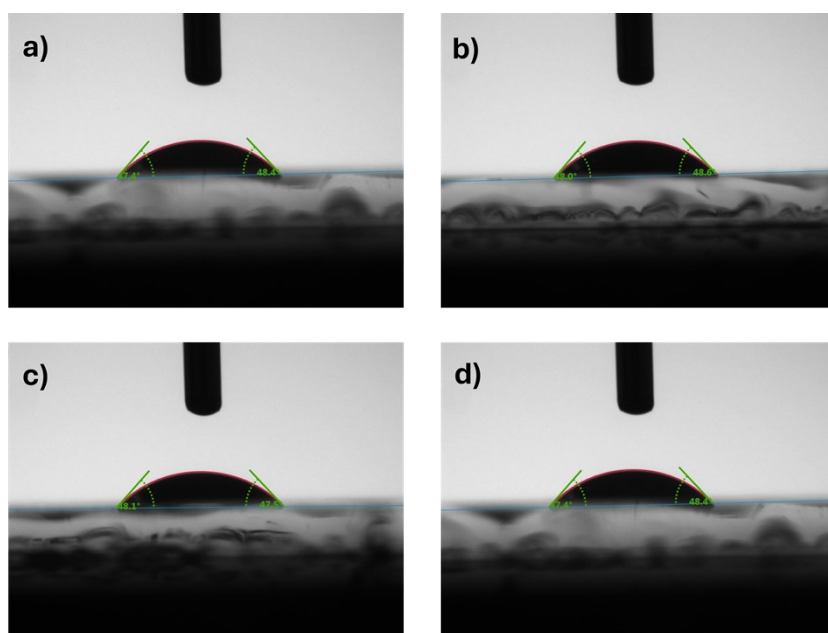

**Figure S5.** Contact angle of the C4VMT/PNAT<sub>30</sub> coatings after 1 redox cycle.

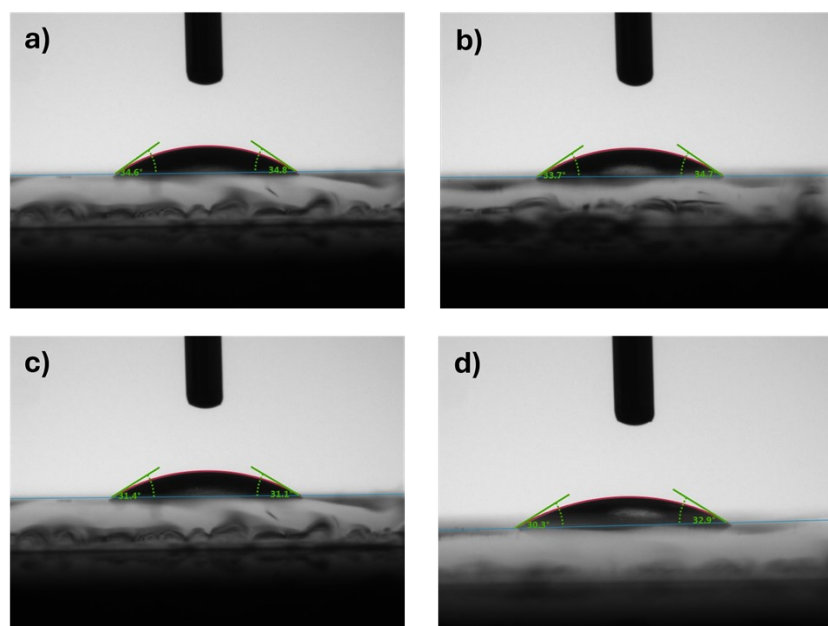

**Figure S6.** Contact angle of the C4VMT/PNAT<sub>30</sub> coatings after 2 redox cycles.

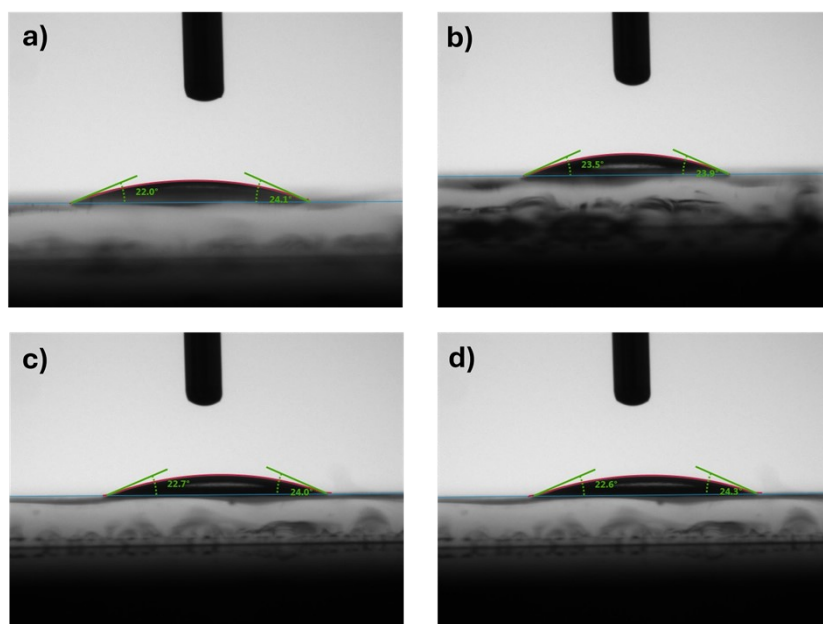

**Figure S7.** Contact angle of the C4VMT/PNAT<sub>30</sub> coatings after 4 redox cycles.

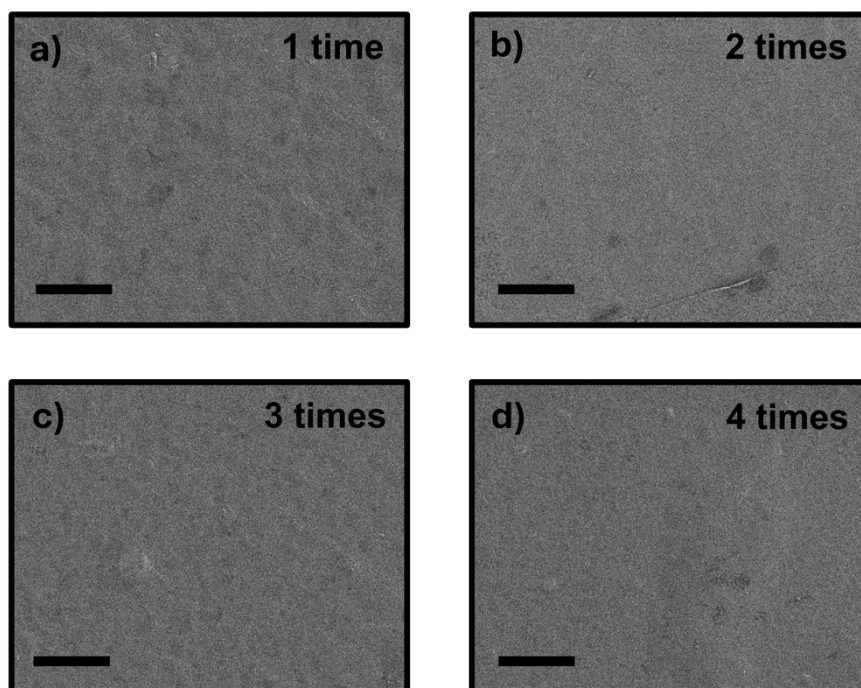

**Figure S8.** SEM images of the surface of the barrier coating and after a) 1, b) 2, c) 3, and d) 4 exposed times to the culture medium without inoculation of *Geobacter metallireducens*. Scale bar: 100  $\mu\text{m}$ .

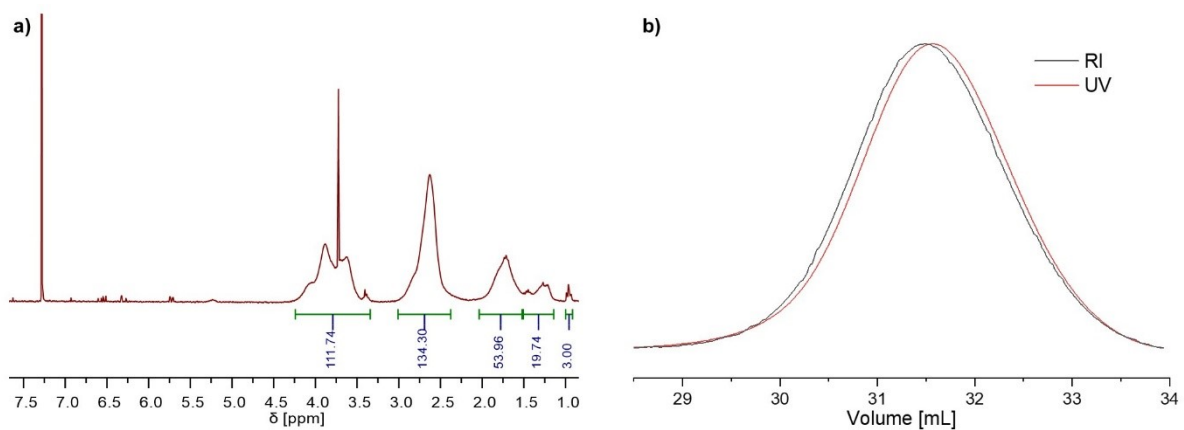

**Figure S9.** a)  $^1\text{H}$  NMR spectrum and b) SEC trace (RI and UV detector) of  $\text{PNAT}_{30}$  after drying.
